# Supplementary material for: Fecal Occult Blood Test Results of the National Colorectal Cancer Screening Program in South Korea (2006–2013)
Source: PubMed Central journal article supplement (PMC5459855; doi:10.1038/s41598-017-03134-9), 2017-06-05

**Fecal Occult Blood Test Results of the National Colorectal Cancer Screening Program in South Korea (2006-2013)**

John Hoon Rim<sup>1,2,3</sup>, MD; Taemi Youk<sup>4,5</sup>, MS; Jung Gu Kang<sup>6</sup>, MD, PhD; Byung Kyu Park<sup>7</sup>, MD, PhD; Heon Yung Gee<sup>2,3</sup>, MD, PhD; Jeong-Ho Kim<sup>1</sup>, MD, PhD; Jongha Yoo<sup>1,8</sup>, MD, PhD

<sup>1</sup>Department of Laboratory Medicine, Severance Hospital, Yonsei University College of Medicine, Seoul, Korea

<sup>2</sup>Department of Medicine, Yonsei University Graduate School of Medicine, Seoul, Korea

<sup>3</sup>Department of Pharmacology, Brain Korea 21 PLUS Project for Medical Sciences, Yonsei University College of Medicine, Seoul, Korea

<sup>4</sup>Research Institute, National Health Insurance Service Ilsan Hospital, Goyang, Korea

<sup>5</sup>Department of Statistics, Korea University, Seoul, Korea

<sup>6</sup>Department of Surgery, National Health Insurance Service Ilsan Hospital, Goyang, Korea

<sup>7</sup>Division of Gastroenterology, Department of Internal Medicine, National Health Insurance Service Ilsan Hospital, Goyang, Korea

<sup>8</sup>Department of Laboratory Medicine, National Health Insurance Service Ilsan Hospital, Goyang, Korea

**Corresponding author:** Jongha Yoo, M.D., Ph.D.

Department of Laboratory Medicine,

National Health Insurance Service Ilsan Hospital,

100 Ilsan-ro, Ilsandong-gu, Goyang 10444, Korea

Tel: +82-31-900-0909, Fax: +82-31-900-0925

E-mail: [jhyooken@gmail.com](mailto:jhyooken@gmail.com)

**Supplementary Table 1.** Comparison of uptake rates, fecal occult blood test positivity rates, and subsequent test compliance rates reported in national colorectal cancer screening for various countries

| Country       | Scotland             | United Kingdom | France    | Italy                                | Canada    | Croatia   | Spain                               | Finland                   | Korea         |
|---------------|----------------------|----------------|-----------|--------------------------------------|-----------|-----------|-------------------------------------|---------------------------|---------------|
| Reference No. | 4                    | 6              | 7         | 8                                    | 9, 26     | 10        | 11                                  | 12                        | Present study |
| Study period  | 2000-2002, 2005-2007 | 2006-2008      | 2008–2009 | 2005-2009                            | 2009-2011 | 2007-2011 | 2000-2004                           | 2004-2007                 | 2006-2013     |
| UR            | 55                   | 51.6           | 34.3      | 49.6 (1st round)/<br>54.4(2nd round) | 7.6-14.8  | 19.9      | 17.2(1st round)/<br>22.3(2nd round) | 68(male)/<br>80(female)   | 30.1          |
| FPR           | 2.07                 | 2.1            | 2.8       | 6.2 (1st round)/<br>5.9(2nd round)   | 4.4       | 6.9       | 3.4(1st round)/<br>0.8(2nd round)   | 3.1(male)/<br>1.6(female) | 6.4           |

---

|     |      |      |    |                   |      |      |      |    |      |
|-----|------|------|----|-------------------|------|------|------|----|------|
| SCR | 85.5 | 87.2 | 88 | 92.0 (1st round)/ | 80.5 | 68.5 | 89.3 | 90 | 46.6 |
|     |      |      |    | 93.0(2nd round)   |      |      |      |    |      |

---

Abbreviations: UR, uptake rate; FPR, fecal occult blood test positivity rate; SCR, subsequent test compliance rate.

**Supplementary Figure 1.** Flow chart of the hierarchical colorectal cancer screening protocol utilized in the Korea national colorectal cancer screening program.

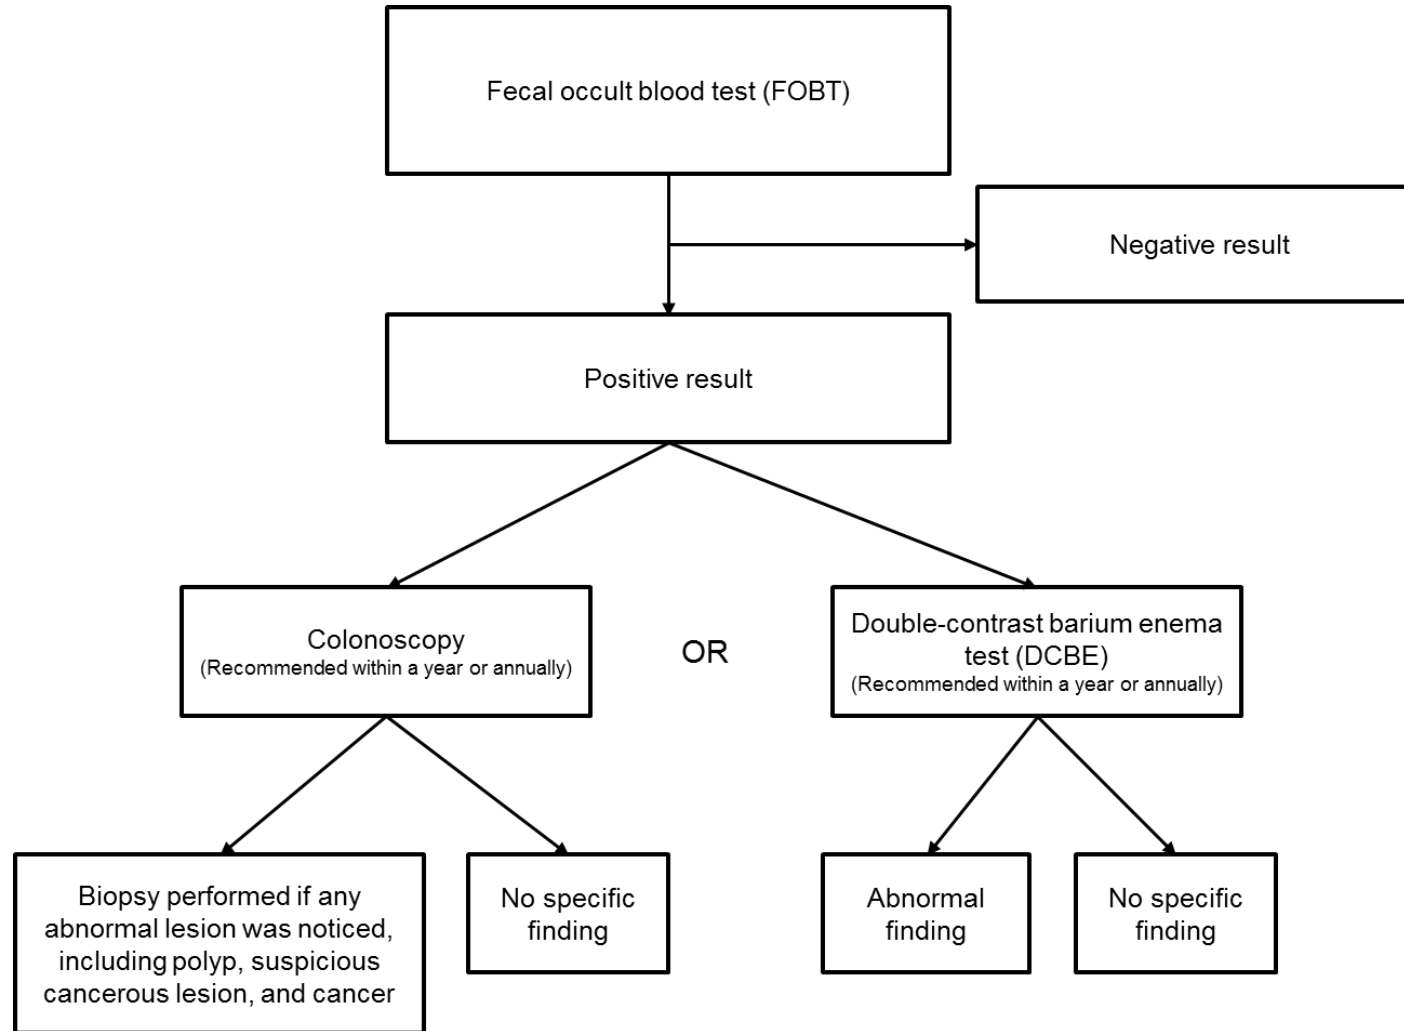

Supplement: 41598_2017_3134_MOESM1_ESM.pdf [file 41598_2017_3134_MOESM1_ESM.pdf]
